1           Growth and rapid succession of methanotrophs effectively limit  
2                                   methane release during lake overturn

3           Magdalena J. Mayr<sup>1,2</sup>, Matthias Zimmermann<sup>1,2</sup>, Jason Dey<sup>1</sup>, Andreas Brand<sup>1,2</sup>, Bernhard Wehrli<sup>1,2</sup>,

4                                   \*Helmut Bürgmann<sup>1</sup>

5                           <sup>1</sup>Eawag, Swiss Federal Institute of Aquatic Science and Technology,

6                                           6047 Kastanienbaum, Switzerland

7           <sup>2</sup>Institute of Biogeochemistry and Pollutant Dynamics, Department of Environmental Systems

8                                           Science, ETH Zurich, 8092 Zurich, Switzerland

9           \*Corresponding author: Helmut Bürgmann, Eawag, Seestrasse 79, 6047 Kastanienbaum, Switzerland,

10                                           +41 58 765 2165, [helmut.buergmann@eawag.ch](mailto:helmut.buergmann@eawag.ch)

11

12

13

14

15

## 16 Abstract

17 Lakes and reservoirs contribute substantially to atmospheric concentrations of the potent greenhouse  
18 gas methane. Lacustrine sediments produce large amounts of methane, which accumulate in oxygen-  
19 depleted hypolimnia of stratified lakes. Due to climate change and progressing eutrophication, the  
20 number of lakes with hypolimnetic methane storage may increase in the future. However, whether  
21 stored methane eventually reaches the atmosphere during lake overturn is a matter of controversy  
22 and depends critically on the response of the methanotroph assemblage. We show that the  
23 methanotroph assemblage in a mixing lake underwent both a substantial bloom and ecological  
24 succession. As a result, the methane oxidation capacity of the mixed layer kept pace with the methane  
25 supplied from the hypolimnion and most of the stored methane was oxidized. This previously  
26 unknown aspect of freshwater methanotroph ecology represents an effective mechanism limiting  
27 methane transfer from lakes to the atmosphere.

## 28 Introduction

29 Lakes and impoundments emit a greenhouse gas (GHG) equivalent of 20% of the global fossil fuel CO<sub>2</sub>  
30 emissions, with methane contributing 75% of these CO<sub>2</sub> equivalents<sup>1</sup>. Stratified lakes accumulate the  
31 potent greenhouse gas methane in their oxygen-depleted bottom waters<sup>2</sup>. During lake overturn,  
32 stored methane may reach the surface layer, thereby running the risk of outgassing. Despite the  
33 established importance of lakes for global GHG emissions, the fate of methane during the overturn  
34 period is still a matter of controversy. Two competing hypotheses regarding the fate of accumulated  
35 methane have been proposed. According to the first line of thinking, most of the stored methane will  
36 be released into the atmosphere<sup>3</sup> as an emission pulse that adds to continuous methane fluxes across  
37 the water-air interface. According to the second hypothesis, methanotrophs oxidize most of the  
38 methane with oxygen to CO<sub>2</sub>, a GHG which has a 34 times lower global warming potential for a 100-yr  
39 time-scale<sup>4</sup> and sequester a small proportion as biomass. Some previous estimates assumed overturn  
40 to occur on very short time scales, e.g. a single day<sup>3</sup> therefore favoring the first hypothesis. Other  
41 studies have indicated that lake overturn typically takes place on a scale of weeks to months, even in  
42 shallow lakes<sup>5-7</sup>, which may allow time for significant methane oxidation. This controversy has not yet  
43 been fully resolved<sup>8</sup> and the role and ecological dynamics of methane-oxidizing bacteria (MOB) during  
44 lake overturn remains to be explored.

45 MOB in lakes have mostly been investigated during the stratified season, when a structured MOB  
46 assemblage forms an efficient methane converter preventing the methane accumulating in the  
47 bottom water from outgassing<sup>9-12</sup>. How the MOB assemblage responds to lake overturn remains  
48 unknown, but its growth rate and resulting methane oxidation capacity is critical for the amount of  
49 methane emitted. During lake overturn environmental conditions change compared to the stratified  
50 situation<sup>13</sup>. The lake cools down and oxygen and methane, which are vertically separated during  
51 stratification, become simultaneously available as water with different substrate concentrations mix  
52 in the expanding surface layer.

53 Here we present a field study covering the entire three months of the autumn lake overturn of shallow  
54 eutrophic Lake Rotsee, Switzerland. We asked (i) if the MOB assemblage grows fast enough to oxidize  
55 the methane mobilized from the bottom water before outgassing and (ii) whether the standing MOB  
56 assemblage is activated, or a new assemblage successively takes over in the changing lake. We used  
57 16S rRNA gene amplicon sequencing, *pmoA* mRNA sequencing and qPCR, CARD-FISH and potential  
58 methane oxidation rate measurements to investigate succession, growth and methane oxidation  
59 capacity of the MOB assemblage during lake overturn. The rates of physical mixing and the transfer  
60 and transformation of methane have been analyzed with a process-based model in a parallel study<sup>14</sup>.

61 The present study provides detailed insights into the dynamics of freshwater lake MOB during the  
62 critical overturn period. We show that a new and highly abundant MOB assemblage, representing up  
63 to 28% of 16S rRNA gene sequences, thrived in the expanding mixed layer. In parallel with MOB  
64 abundance, the methane oxidation capacity of the lake increased substantially, thereby limiting  
65 methane emissions to a small percentage of the stored methane.

## 66 Results

### 67 Characteristics of stratification and overturn dynamics

68 To determine the response of the MOB assemblage and methane oxidation activity to lake overturn,  
69 we sampled the shallow eutrophic Lake Rotsee at eight time points covering stratification, overturn  
70 and inverse stratification. The starting point of our sampling campaign on Oct 4, 2017 represents a  
71 typical stratified situation, which in Rotsee starts to develop in May<sup>15</sup>. In the following, we refer to the  
72 large amounts of methane that have accumulated during summer in the hypolimnion as ‘stored  
73 methane’.

74 Most of the oxygen and stored methane in the water column were vertically separated from each  
75 other prior to lake overturn (Fig. 1A). The lake water cooled down from October to January, resulting  
76 in a gradual expansion of the mixed layer until December (Fig. 1B). By Dec 12, a cooler mixed layer  
77 formed on top of warmer bottom water (Fig. 1B), which has a slightly higher salinity (Supplementary  
78 Fig. 1).

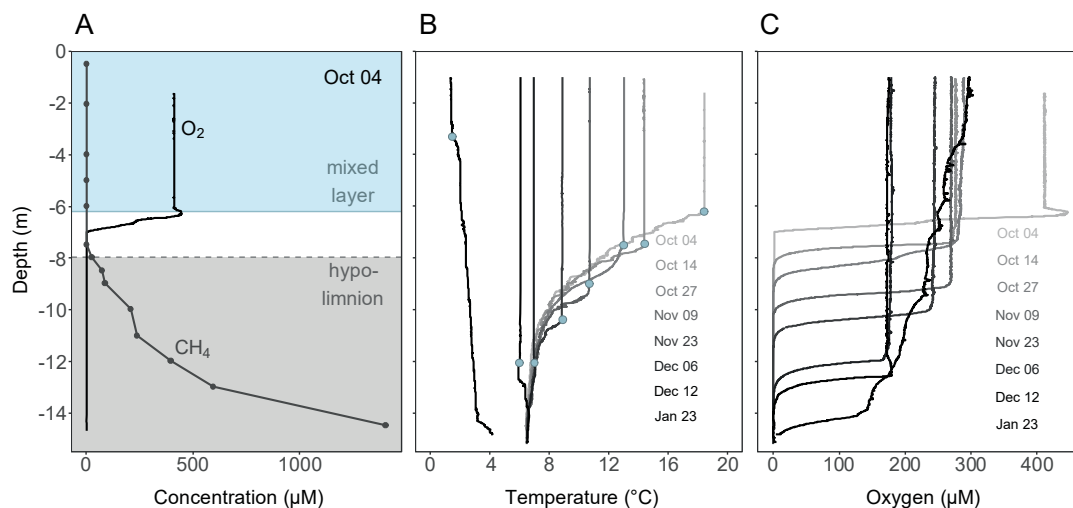

**Figure 1** Stratification and progressive deepening of the mixed layer during lake overturn. Depth profiles of physicochemical parameters in Rotsee during the lake overturn period of 2017. **A)** Stratified situation in Rotsee prior to lake overturn. Oxygen in the mixed layer and methane in the hypolimnion are separated from each other. The methane-enriched hypolimnion ( $\geq 2 \mu\text{M}$ ) is shaded in grey, the mixed layer is shaded in blue. **B)** Temperature profiles of the cooling lake in autumn and winter and the resulting expansion of the mixed layer at each sampling date. Blue dots indicate the mixed layer depth. In January an inverse stratification established. **C)** Corresponding oxygen profiles at each sampling date.

79

80 From October to December, a total of 4.2 Mg C (ref. 14) of stored methane gradually entered the  
81 expanding mixed layer (Supplementary Fig. 2). Nevertheless, median methane concentrations in the  
82 surface layer stayed low, ranging from 0.1 – 1.1  $\mu\text{M}$ . During overturn, oxygen levels in the mixed layer  
83 dropped down to approx. 175  $\mu\text{M}$  (Dec 12, Fig. 1C), likely due to methane and other reduced  
84 substances from the hypolimnion triggering abiotic and biotic oxygen consumption. From December  
85 to January, oxygen concentrations increased again.

#### 86 The methane oxidizing assemblage prior to lake overturn

87 We analyzed the MOB assemblage with a set of independent and mutually supportive methods. We  
88 used 16S rRNA gene sequencing to phylogenetically identify known groups of MOB, to estimate their  
89 proportion among the bacterial community and to assess MOB assemblage dynamics. The *pmoA*  
90 mRNA sequencing combined with qPCR provided an independent assessment of the MOB assemblage  
91 as well as confirmation of transcriptional activity of the methane monooxygenase. To facilitate  
92 interpretation, we assigned the same colors to MOB ASVs (MOB-affiliated 16S rRNA amplicon  
93 sequence variants) and aaASVs (*pmoA* amino acid operational taxonomic units) in Fig 3 and 4 and  
94 supplementary figures, if they showed similar relative abundance and distribution pattern in a  
95 canonical correspondence analysis (Supplementary Fig. 3) and compatible placement within the  
96 phylogenetic trees (Supplementary Fig. 4).

97 On Oct 4, the proportion of MOB ASVs and the copy number of *pmoA* transcripts peaked at the upper  
98 boundary of the methane-enriched hypolimnion, although both measures showed that MOB were  
99 present throughout the water column (Fig. 2A, B). The hypolimnion harbored a higher proportion of  
100 MOB ASVs and more *pmoA* transcripts than the oxygen-rich mixed layer. Therefore, it represents a  
101 potential reservoir of MOB for the following lake overturn. The composition of the MOB assemblage  
102 differed strongly between the mixed layer and hypolimnion. The mixed layer was dominated by  
103 gammaproteobacterial type Ia MOB (Fig. 2A, B, blue) assigned to uncultivated groups CABC2E06/Lake  
104 cluster1 (ASV\_5/aaASV1 and aaASV6). According to 16S rRNA gene-based analysis a *Methylocystis*

105 (ASV\_354, yellow) was also dominant, however the corresponding aaASV7 *pmoA* transcript was rather  
106 underrepresented (Supplementary Fig. 5).

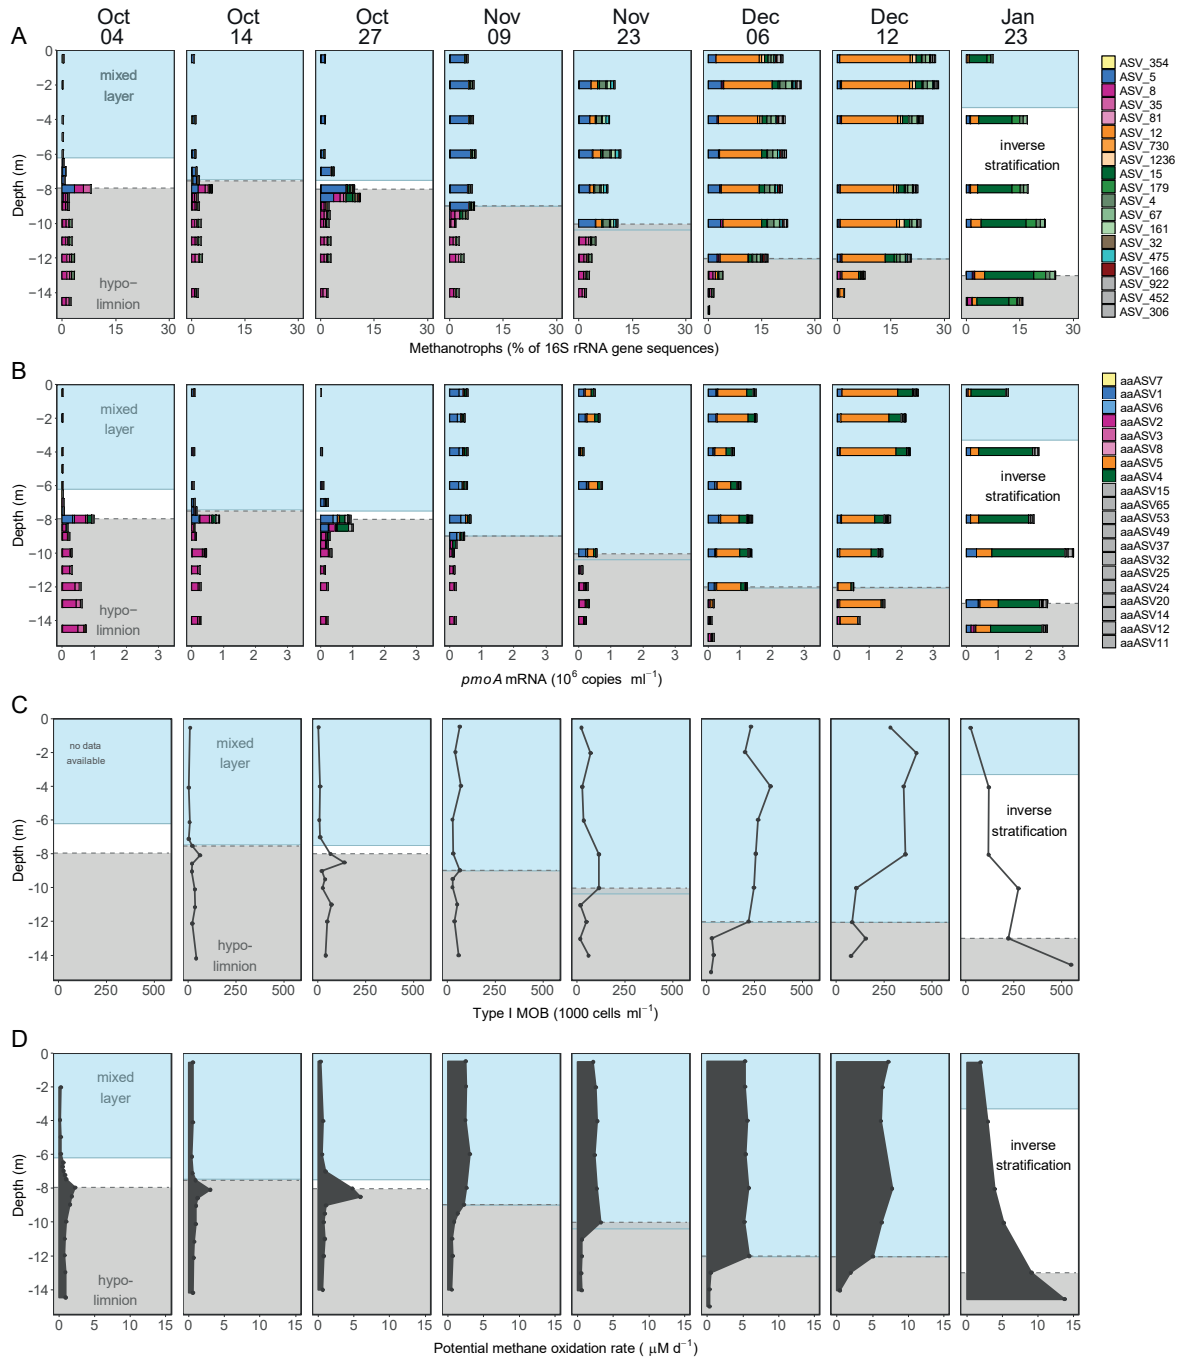

**Figure 2** Depth distribution and dynamics of the MOB assemblage, *pmoA* transcripts, MOB cell numbers and potential methane oxidation rates during lake overturn. The mixed layer (blue background) depth increased with time, while the methane-rich hypolimnion starting at  $\geq 2 \mu M CH_4$ , (gray background) got gradually incorporated into the mixed layer. **A)** Abundance and composition of MOB from 16S rRNA gene amplicon sequencing normalized to all bacterial 16S rRNA gene sequences. Colors distinguish MOB at the ASV level. **B)** *pmoA* transcript abundance derived from qPCR quantification (copies  $ml^{-1}$ ) of *pmoA* multiplied with the relative abundance of *pmoA* mRNA aaASVs from *pmoA* amplicon sequencing. Colors correspond to aaASVs. ASVs and aaASVs which, based on multiple lines of evidence (see methods), are thought to originate from the same organism are encoded with the same color. **C)** MOB cell abundance as determined by CARD-FISH. **D)** Potential methane oxidation rates.

107

108

109



110 In the hypolimnion, other uncultivated type I MOB closely related to lacustrine Crenothrix prevailed  
111 (ASV\_8, 35, 81, with 95.6-96.7% identity and aaASV2, 3, 8, with 96.1-97.4% identity to lacustrine  
112 Crenothrix; shown in shades of pink). In between the mixed layer and the methane-enriched  
113 hypolimnion the abundance of additional MOB sequences peaked, e.g. ASV\_166 (Supplementary Fig.  
114 5A) and aaASV12.

#### 115 MOB dynamics at the onset of the overturn

116 By Oct 27 we observed an increase of MOB abundance and *pmoA* transcripts at the upper boundary  
117 of the methane-enriched hypolimnion (Fig. 2A, B). Although the mixed layer depth increased  
118 throughout October, it did not yet reach the methane-enriched hypolimnion (Fig. 2A, B). However, the  
119 deepening of the mixed layer brought oxygen-rich water closer to the hypolimnion, likely increasing  
120 the downward oxygen flux.

121 By Nov 9 the mixed layer had finally reached and eroded a small part of the methane-enriched  
122 hypolimnion (Fig. 2A, B). The MOB observed in the peak from Oct 27 had thus likely been entrained  
123 into the mixed layer. It is likely that both CABC2E06 (ASV\_5/aaASV1 and 6, blue), as well as Crenothrix-  
124 related MOB (ASV\_8/aaASV2, pink) were transported into the mixed layer. However, only the  
125 members of the CABC2E06 group (blue), which already prevailed in the mixed layer in October showed  
126 up as the dominant MOB in the expanding mixed layer (Fig. 2A, B, Supplementary Fig. 5). Thus, both  
127 transport of MOB to, and their growth in the mixed layer may have contributed to the increased MOB  
128 percentage and *pmoA* transcript numbers observed on Nov 9 (Fig. 2A, B). After this date, we no longer  
129 observed the MOB peak formation at the oxygen-methane interface typical for the stratified period,  
130 likely because the interface was now constantly moving downwards as the mixed layer deepened (Fig.  
131 2A, B).

132 Dynamics of the MOB assemblage during the main phase of the overturn

133 From Nov 9 to Dec 12 the mixed layer deepened from 9 to 12 m, thereby incorporating large amounts  
134 of stored methane. It must be assumed that the MOB assemblage from the hypolimnion was  
135 continuously transported into the mixed layer. However, the Crenothrix-related MOB that dominated  
136 there (Fig. 2A, B) were only detected at very low abundances in the mixed layer. Instead, a MOB with  
137 97.2% rRNA gene fragment sequence identity to *Methylosoma difficile* (ASV\_12/aaASV5,  
138 Supplementary Fig. 4A) was rapidly increasing in abundance, peaking at a median percentage of 16%  
139 of all bacterial sequences in the mixed layer on Dec 12 (Fig. 2A, B, orange). At this date, all MOB  
140 sequences together reached up to 28% of the bacterial sequences, with ASV\_12 as the most important  
141 contributor to the increase in MOB abundance. This taxon was already present in October, but at very  
142 low proportion with a maximum relative abundance of 0.2% of bacterial rRNA gene sequences.

143 In January, an inverse stratification formed and only close to the bottom of the lake (16 m max. depth)  
144 a small part of the water column retained stored methane. MOB proportion and mRNA copy numbers  
145 of ASV\_12/aaASV5 decreased and the MOB assemblage shifted again, with ASV\_15/aaASV4 (green,  
146 Fig. 2A, B) now dominating.

147 Dynamics of potential methane oxidation capacity and MOB cell numbers

148 In October, type I MOB cell numbers as determined by CARD-FISH peaked at the upper boundary of  
149 the methane-enriched hypolimnion, corroborating the patterns observed with MOB ASVs and *pmoA*  
150 mRNA transcripts. Further, potential methane oxidation rates showed a strikingly similar pattern,  
151 suggesting that the MOB assemblages were active. Even within the oxygen-depleted hypolimnion,  
152 potential methane oxidation rates never fell below  $0.3 \mu\text{M d}^{-1}$  (Fig. 2C). Throughout the lake overturn,  
153 MOB cell numbers and potential methane oxidation rates increased substantially within the mixed  
154 layer (Fig. 2C, D). By Dec 12, the potential methane oxidation rates in the entire mixed layer exceeded  
155 the maximum rates during stable stratification, when maximum rates are usually confined to a narrow

156 layer at the oxygen-methane interface. The water volume capable of these high rates had thus  
157 expanded significantly (Fig. 2D). In combination, this led to an overall increase of the potential  
158 methane oxidation capacity in the mixed layer from 0.01 Mg C d<sup>-1</sup> to 0.3 Mg C d<sup>-1</sup> between October  
159 and December (Fig. 2D) corresponding to a doubling of the rate every 12.7 days. At the same time,  
160 MOB cell numbers in the mixed layer increased with a net doubling time of approximately 9 days.  
161 After lake overturn was complete, i.e. between Dec 12 and Jan 23, potential methane oxidation rates  
162 and MOB cell numbers generally decreased at the water depths formerly occupied by the mixed layer.  
163 The methane oxidation rates and MOB abundance now increased with depth and peaked in the  
164 remaining methane-enriched bottom layer near the sediment (Fig. 2C, D). All measured MOB  
165 parameters were significantly correlated (Supplementary Tab. 1).

#### 166 *Winners and losers: thriving mixed layer MOB and fate of hypolimnetic MOB*

167 The winners of the lake overturn were taxa of the mixed layer MOB assemblage (Fig. 3A), which  
168 contributed substantially to the increase of potential methane oxidation rates (Fig. 3B). The profound  
169 shift in the composition of the MOB assemblage suggested that the changing physical and chemical  
170 conditions in the lake influenced the succession (Fig. 3 and Supplementary Fig. 3).

171

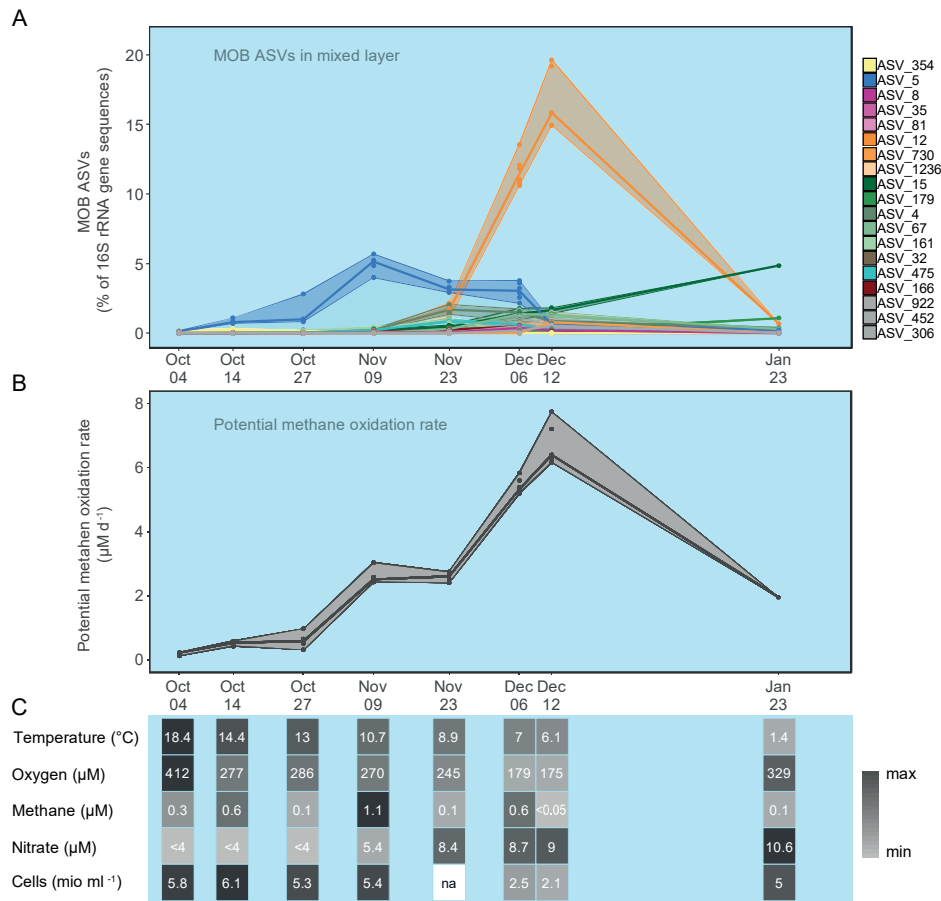

**Figure 3** Mixed layer dynamics during lake overturn. **A)** MOB assemblage dynamics at the ASV level within the expanding mixed layer during lake overturn. Maximum, minimum and median relative abundance of each MOB ASV within the mixed layer are visualized with lines. Colors correspond to MOB ASVs. **B)** Dynamics of potential methane oxidation rates during lake overturn. Lines depict maximum, minimum and median within the mixed layer. **C)** Table illustrating the corresponding change in physical, chemical and biological environmental parameters in the mixed layer over time. The median of the mixed layer samples is shown for each parameter and sampling date. Shades of gray are scaled between minimum (light grey) and maximum (black) values. Values below the limit of quantification are marked with “<” and missing data with “na”. Raw data for B and C are provided in Supplementary Table 2.

172

173 The dominance of CAB2E06 (ASV\_5) in the oxygen-rich mixed layer until November supports  
 174 previous observations of this taxon occurring under, and being correlated with, elevated oxygen  
 175 concentrations during stable stratification in four Swiss lakes<sup>16</sup>. Our observations in this study further  
 176 support the view that this MOB taxon thrives under high oxygen concentration and continuous but  
 177 low-concentration methane supply. Despite its occurrence in several lakes and its sometimes high  
 178 abundance and pivotal role during overturn, lack of a cultured representatives or genomes currently  
 179 precludes further insights into the ecology of this taxon.

180 The early dominance of CAB2E06 (ASV\_5) was followed by a pronounced increase of the  
181 *Methylosoma*-related ASV\_12 until Dec 12, which led to dominance of this taxon during the lake  
182 overturn (orange, Fig. 3A). The growth phase of ASV\_12 was accompanied by a drop in water  
183 temperature to below 10 °C, and increasing nutrient levels in the mixed layer (nitrate, Fig. 3C). The  
184 only cultured representative of *Methylosoma*, *M. difficile* is microaerophilic<sup>17</sup>, which is in line with the  
185 observation that ASV\_12 dominated during the period with the lowest measured oxygen  
186 concentration in the mixed layer (175 µM). This taxon was not observed in three other Swiss lakes in  
187 a previous study<sup>16</sup>, and was only detected at very low abundance in the October samples of Rotsee in  
188 this campaign. This MOB taxon thus appears to be seasonally restricted or conditionally rare, but  
189 nevertheless was the most spectacular profiteer of the lake overturn and highly relevant to methane  
190 mitigation during our study period.

191 ASV\_15, related to *Methylobacter tundripaludum* (98.6% identity) steadily increased during the later  
192 phase of the overturn and dominated the MOB assemblage on Jan 23. This finding could perhaps be  
193 explained by an adaptation of ASV\_15 to low temperatures: lake water cooled to below 4°C in this  
194 period and oxygen levels replenished, while elevated nutrient levels persisted (Fig. 3C). Previous  
195 observations of psychrophily within the *Methylobacter* genus<sup>18</sup> provide some support for this  
196 hypothesis.

197 The losers of the lake overturn, Crenothrix-related ASVs/aaASVs (ASV\_8, 35, 81 pink), remained  
198 restricted to the eroding hypolimnion, until only a tiny fraction was left on Jan 23 (Fig. 2A, B,  
199 Supplementary Fig. 5). The Crenothrix were never able to establish in the mixed layer, although these  
200 taxa were presumably inoculated continuously. This suggests that their ecological specialization may  
201 be responsible, as proposed earlier<sup>16</sup>. They resided in water layers with high methane concentrations  
202 and are thought to rely on oxygen released from phytoplankton<sup>19</sup> or from temporally and spatially  
203 limited nano- to micromolar oxygen intrusions<sup>20</sup>. On the other hand, the *Methylobacter*  
204 *tundripaludum*-like ASV\_4 (99.3% identity) which was present at low abundance in the hypolimnion

205 gained momentum temporarily in the mixed layer in Nov and Dec (Fig. 3A), suggesting a comparatively  
206 more flexible ecology for this organism.

## 207 Discussion

208 In this study, we provide the first comprehensive analysis of the response of a MOB assemblage to  
209 autumn lake overturn. We asked if the MOB assemblage grows fast enough to oxidize the stored  
210 methane before outgassing. Our results show unambiguously that the MOB assemblage in the  
211 observed lake was indeed reacting fast enough to minimize outgassing of the GHG methane during a  
212 gradual lake overturn. MOB growth led to a substantial increase in MOB abundance until MOB made  
213 up 28% of the bacterial 16S rRNA gene sequences in the mixed layer (Fig. 2). This established a high  
214 methane oxidation capacity in the expanding mixed layer. We further asked whether the standing  
215 MOB assemblage is activated, or a new assemblage successively takes over. We found that a temporal  
216 succession of MOB taxa underpins the increasing MOB abundance and methane oxidation capacity  
217 (Fig. 3A, B). Growth of a new MOB assemblage and its methane oxidation capacity limited the emitted  
218 methane to a small percentage of the stored methane during lake overturn (Zimmermann et al. 2019).

219 Beyond these main findings our work provides a number of insights into the ecology of freshwater  
220 MOB. There is some evidence that the successional patterns of MOB, similar to vertical niche  
221 preferences discussed previously<sup>16</sup> are related to specific adaptations of the successful taxa. During  
222 the phase with the highest methane oxidation capacity in the lake, the initial MOB assemblage of both,  
223 mixed layer and hypolimnion, had been almost entirely replaced by a new MOB assemblage (Fig. 2).  
224 Different MOB reached a high degree of dominance at different stages of the lake overturn, indicating  
225 that the changing environmental conditions favored temporal niche partitioning of MOB taxa (Fig. 3).  
226 It is notable, however, that despite the well-mixed situation and the often-observed dominance of a  
227 single taxon, a diverse MOB assemblage was nevertheless present throughout the overturn period.  
228 Answering the question whether the same or similar MOB are dominating the fall overturn every year  
229 will require a longer-term monitoring effort. Presence of MOB taxa with specific adaptation that allow  
230 them to take advantage of the rapidly changing conditions in the overturning lake is likely essential to  
231 establishing the methane oxidation capacity that ultimately limits methane outgassing.

232 Although methane becomes available in the mixed layer, dilution and rapid oxidation keep  
233 concentrations low as opposed to the situation in the hypolimnion (Fig. 3C). MOB in the mixed layer  
234 thus likely require a relatively high methane affinity for growth. We therefore speculate that the  
235 methane affinity of the mixed-layer MOB assemblage may be a critical factor for the amount of  
236 diffusive methane outgassing to the atmosphere during the overturn period. In addition to the  
237 inherent methane affinity of MOB taxa and assemblages, other traits like growth rates and ability to  
238 access nutrients likely affect the build-up of the methane-oxidation capacity in the lake and require  
239 further exploration.

240 The net doubling time of MOB in the expanding mixed layer of 9 days suggested slow growth, but  
241 MOB substantially increased their abundance and reached a total methane oxidation capacity in the  
242 mixed layer volume of approximately 0.3 Mg carbon per day (Dec 12). Our oxidation capacity estimate  
243 is conservative as only potential methane oxidation to CO<sub>2</sub> was measured and incorporation into  
244 biomass is not included. Even though the MOB growth rates seem low compared to observations in  
245 MOB isolates<sup>21</sup> they may be in line with the environmental conditions: temperatures in the mixed layer  
246 dropped from 18.4 (Oct 4) to 6.1°C (Dec 12), thus slowing process and growth rates are expected.  
247 Further, persistently low methane concentrations likely reduced effective growth rates. Because of  
248 the evident succession within the MOB assemblage, the doubling time given above represents a sum  
249 over all taxa and growth rates of e.g. taxa becoming dominant were certainly faster as other taxa  
250 stagnated or decreased in abundance at the same time. Finally, gross growth rates are likely higher as  
251 mortality rates remain unknown.

252 While some estimates of global methane emissions from lakes assume that all stored methane is  
253 emitted to the atmosphere<sup>3,22</sup>, our data is in line with a number of field studies that suggest a  
254 considerable proportion of stored methane is oxidized. One study estimated that 46% of the stored  
255 methane is emitted during autumn lake overturn<sup>8</sup>, but most estimates are higher, claiming oxidation  
256 of 75 – 94% of the stored methane<sup>6,7,23</sup>. Rotsee methane emission data from eddy-covariance flux



257 measurements and modelling<sup>14</sup> obtained in parallel with this study showed that in the present case  
258 even about 98% of the stored methane was oxidized. Our data demonstrate that this outcome was  
259 based on the robust response of MOB in the mixed layer where a succession of MOB maintained a  
260 high methane oxidation capacity throughout the overturn. We must therefore caution against adding  
261 methane storage to lake emission estimates. Certainly, lakes remain significant sources of  
262 atmospheric methane: ebullition bypasses biological oxidation and rapid overturn events due to e.g.  
263 fast lake cooling and strong winds will lead to increased outgassing<sup>6,14</sup>. Processes as observed in Rotsee  
264 may occur in a considerable proportion of temperate lakes and might be important to global methane  
265 flux estimates. Most lakes in temperate regions are holomictic and have a mean lake depth of < 25 m.  
266 Worldwide, small (size classes 0.1-1 and 1-10 km<sup>2</sup>), relatively shallow (average depth 5 and 5.4 m,  
267 respectively) lakes represent 28% of the estimated global lake area<sup>24</sup> and methane storage is  
268 frequently observed especially in small lakes<sup>3</sup>. The number of lakes with hypolimnetic methane  
269 storage may increase in future due to lack of recovery of lakes from eutrophication<sup>25</sup> and continuing  
270 eutrophication of other lakes<sup>26</sup>, while global warming could strengthen summer stratification and, in  
271 turn, methane accumulation. A comprehensive understanding on the fate of stored methane in  
272 transitionally stratified lakes and information on the adaptability of MOB to different environmental  
273 conditions and their methane oxidation kinetics are therefore critical.

274 In summary, we showed in this comprehensive study that successional changes in the MOB  
275 assemblage of the mixed layer of an overturning lake secured high MOB abundance with an  
276 extraordinarily high methane-oxidation capacity that significantly reduced the atmospheric emissions  
277 of stored methane.

## 278 Methods

### 279 Environmental sampling and profiling during autumn overturn

280 A temperate holomictic lake, Rotsee (47.072 N and 8.319 E) in Central Switzerland was sampled on 8  
281 dates from Oct 4, 2016 to Jan 23, 2017 (see Fig 1). This sampling period covered the end of  
282 stratification with maximal methane accumulation in the hypolimnion and the subsequent autumn  
283 overturn. A moored thermistor chain with 1 m resolution provided temperature measurements every  
284 three hours, documenting the mixing process and serving as a basis for scheduling the sampling dates.  
285 We defined the mixed layer depth as the part of the water column with a uniform temperature profile.  
286 At each sampling date, continuous profiles of temperature and oxygen (PSt1, Presens, Regensburg,  
287 Germany), were measured with the profiling *in-situ* analyzer (PIA) as described previously<sup>27</sup>. Sampling  
288 depths for further analyses were set based on the PIA profiles. The PIA was equipped with a syringe  
289 sampler for targeted depth sampling at 25 cm resolution, integrating about 5 cm water column,  
290 allowing for improved resolution compared to conventional Niskin bottle sampling which integrates  
291 over >50 cm.

292 Water samples for analysis of ammonium, nitrate and dissolved inorganic carbon (DIC) were filtered  
293 with a 0.2 µm pore size cellulose acetate filter (Sartorius, Göttingen, Germany) and stored at 4°C until  
294 analysis. Ammonium was measured by ion chromatography (Metrohm, Herisau, Switzerland) and  
295 nitrate with a flow-injection analyzer (SAN++, Skalar, Breda, The Netherlands). A total organic carbon  
296 analyzer (Shimadzu, Kyoto, Japan) was used for DIC quantification. Water samples for flow cytometry  
297 were fixed with formaldehyde and stained with SYBR Green I (Thermo Fisher Scientific, Waltham, MA,  
298 USA) at 37°C for 15 min. Particles were counted on an Accuri C6 flow cytometer (BD Biosciences, San  
299 Jose, CA, USA) and microbial cell counts determined as described previously<sup>28</sup>.

300 Samples for methane measurements were injected into airtight 40 ml serum vials filled with N<sub>2</sub> gas  
301 and 4 g NaOH pellets (≥98% purity, Sigma-Aldrich, Darmstadt, Germany) for preservation. Gas

302 chromatography (6890N, Agilent Technologies, Santa Clara, CA, USA) was used to measure methane  
303 in the headspace. The GC was equipped with a Carboxen 1010 column (Supelco, Bellefonte, PA, USA)  
304 and a flame ionization detector. Control experiments showed that 4 g of solid NaOH released 32.6  
305 nmol CH<sub>4</sub> on average which was accounted for when back-calculating methane concentrations in  
306 water based on Wiesenburg and Guinasso (1979)<sup>29</sup>.

### 307 Nucleic acid purification

308 110 ml lake water were filtered on site through 0.2 µm cellulose acetate filters (Sartorius) and instantly  
309 frozen on dry ice. Samples were stored at -80 °C until extraction. Genomic DNA and total RNA were  
310 extracted from the same filter with the AllPrep DNA/RNA Mini Kit (Qiagen, Hilden, Germany) with a  
311 bead beating step on a FastPrep-24 (MP Biomedicals, Santa Ana, CA, USA) and 150-212 µm glass  
312 beads. Residual DNA in RNA extracts was digested using the TURBO DNA-free kit (Thermo Fisher  
313 Scientific). DNA removal was checked by gel electrophoresis after PCR (16S rRNA gene, 27f/1492r, 35  
314 cycles) and if required, a second digestion was performed. If the second digestion was not sufficient  
315 to remove the DNA, the sample was excluded (one sample). cDNA was reverse transcribed from RNA  
316 with random hexamers using SuperScript IV First-Strand Synthesis System (Thermo Fisher Scientific).  
317 DNA and cDNA were used for Illumina MiSeq sequencing and qPCR.

### 318 16S rRNA and *pmoA* sequencing and analysis

319 Bacterial 16S rRNA gene and rRNA (S-D-Bact-0341-b-S-17, D-Bact-0785-a-A-21)<sup>30</sup> and functional  
320 marker *pmoA* gene and transcript (189f, mb661)<sup>31</sup> amplicon libraries were sequenced on the Illumina  
321 MiSeq platform (Illumina Inc., San Diego, CA, USA). Briefly, the first PCR was performed in triplicate  
322 with tailed forward and reverse primers using NEBNext Q5® Hot Start HiFi PCR Master Mix (New  
323 England BioLabs, Hitchin, UK) and 17 and 25 cycles for the bacterial and functional marker,  
324 respectively. Illumina barcodes and adapters were attached to pooled and purified products in a  
325 second PCR (8 cycles) with the Nextera XT Index Kit A and D (Illumina Inc.). Libraries were purified with

326 Agencourt AMPure XP kit (Beckman Coulter, Indianapolis, IN, USA), quantified (Qubit, Thermo Fischer  
327 Scientific) and pooled. After quality check on a Tape Station 2200 (Agilent Genomics, USA) the two  
328 sequencing runs with 600-cycle MiSeq reagent kit v3 and 10% PhiX were performed at the Genetic  
329 Diversity Centre (ETH Zurich).

330 Amplicon sequence variants (ASVs) were inferred with the DADA2 pipeline<sup>32</sup> (v1.6.0) in R<sup>33</sup> (v3.4.1).  
331 Reads reaching a quality score of two were truncated and reads with ambiguous bases or an expected  
332 error rate exceeding three were removed. 16S rRNA reads were trimmed to 270 nt (forward) and 210  
333 nt (reverse) and *pmoA* reverse reads were trimmed to 235 nt. The ASV table was produced following  
334 the DADA2 pipeline. Samples with less than 5000 reads were removed. Taxonomy of 16S rRNA ASVs  
335 was assigned using the SILVA reference database (v132)<sup>34</sup> and reads assigned to mitochondria or  
336 chloroplasts were removed with phyloseq<sup>35</sup> (1.24.2) in R (3.5.0). The 16S rRNA data set was screened  
337 for known methanotrophic groups<sup>36</sup> within the order *Methylococcales*, genera within class  
338 *Alphaproteobacteria* and phylum *Verrucomicrobia*, and *Candidatus Methyloirabilis*. ASVs reaching  
339 >0.2% relative abundance in at least 3 samples were retained for further analysis. To increase  
340 readability of Fig. 2 two samples (Oct 04) are not shown (7.25 m and 6.75 m), which does not change  
341 data interpretation. Amino acid sequences (aaASV) were derived from *pmoA* ASVs in MEGA7<sup>37</sup> and  
342 were retained for further analyses when exceeding 2% relative abundance in at least one sample.  
343 Neighbor-joining trees were constructed in MEGA7 with 10000 bootstrap replications using Jukes-  
344 Cantor evolutionary distance for 16S rRNA sequences or Poisson correction method for *pmoA* amino  
345 acid sequences. To facilitate interpretation we assigned the same colors for MOB ASVs (MOB-affiliated  
346 16S rRNA amplicon sequence variants) and aaASVs (*pmoA* amino acid operational taxonomic units) if  
347 they (i) showed similar relative abundance and distribution patterns as observed in a canonical  
348 correspondence analysis (Supplementary Fig. 3), and (ii) if placement in the phylogenetic trees was  
349 compatible with this interpretation.

## 350 *pmoA* gene and transcript quantification

351 The amount of *pmoA* DNA and mRNA copies in lake water during overturn was quantified by qPCR  
352 using the 189f-mb661 primer pair<sup>31</sup> on a LightCycler 480 (Roche Diagnostics, Rotkreuz, Switzerland).  
353 10µl reactions were performed with 0.2 µM primer, 2 µl of 1:10 diluted DNA or cDNA and the SYBR  
354 Green I Master mix (Roche). We used PCR conditions adapted from Henneberger et al. (2015)<sup>38</sup> with  
355 10 min initial denaturation, 15 s denaturation during cycling and acquisition at 79°C. Standards were  
356 obtained by 10-fold serial dilution of *pmoA* containing plasmid, which were measured in  
357 quadruplicates. Sample assays were performed in triplicates and analysed with the LightCycler 480  
358 software (v1.5.1.62) with the second derivative maximum method.

## 359 Potential methane oxidation rates

360 Water samples were filled into 60 ml serum vials in the field and laboratory incubations were started  
361 the same day. The applied procedure to determine potential methane oxidation was adapted from  
362 Oswald et al. 2015<sup>19</sup>. Each sample was purged with N<sub>2</sub> to remove residual methane, amended with  
363 non-limiting concentrations of oxygen (~50 µmol L<sup>-1</sup>) and <sup>13</sup>C-CH<sub>4</sub> (~80 µmol L<sup>-1</sup>), and subdivided into  
364 five Exetainers<sup>39</sup> (6ml) that were kept dark and close to the *in-situ* temperature of the mixed layer as  
365 determined at the date of sampling. Incubations were stopped after 0, 3, 13, 25 and 50 hours with  
366 100 µl ZnCl<sub>2</sub> 50% w/v. The increase of <sup>13</sup>C-CO<sub>2</sub> was determined with GC-IRMS (IsoPrime, Micromass,  
367 Wilmslow, UK). Rates were derived from a linear regression of the <sup>13</sup>C-CO<sub>2</sub> production over time, taking  
368 into account the background DIC in the sample. Carrara marble (ETH Zurich, δ<sup>13</sup>C of 2.1‰) served as  
369 a standard.

## 370 MOB quantification with CARD-FISH

371 To quantify MOB dynamics in terms of cell numbers we applied CARD-FISH. Samples were fixed with  
372 formaldehyde (2% final concentration) for 3-6 hours on ice prior to filtration onto 0.2 µm

373 polycarbonate nuclepore track-etched membrane filters (Whatman, Maidstone, UK). Dry filters were  
374 stored at -20°C until further processing. Filters were embedded in 0.2% low gelling point agarose  
375 (Metaphor, Lonza), cells were permeabilized with lysozyme (10 mg ml<sup>-1</sup>) for 70 min at 37°C and  
376 peroxidases inactivated in 10 mM HCl for 10 min. The probes Mg84, Mg669 and Mg705<sup>40</sup> were mixed  
377 to target type I MOB. As control probes EUB338I-III (universal bacterial probe, positive control) and  
378 NON338 (negative control)<sup>41,42</sup> were separately applied to each sample. Filters were incubated at 46°C  
379 for 2.5 h with 150 µl of the respective hybridization buffer (20% formamide Mg-mix and 35% for EUB  
380 and NON) containing 1 µl of probe (50 ng µl<sup>-1</sup>). After washing, filters were placed into the amplification  
381 buffer containing Oregon Green 488 at 37°C for 30 min in the dark. DAPI was used for counterstaining  
382 and the filters were mounted on glass slides in a mix of Citifluor and Vectashield (4:1).

383 Epifluorescence images were taken with an inverted microscope (DMI6000 B, Leica, Wetzlar,  
384 Germany) and a 100x/1.3 objective (PL-FL, Leica). To obtain clear images, multifocal images were  
385 recorded and merged with LASX software (Leica). DAPI and the corresponding CARD-FISH images of  
386 22 randomly selected fields per filter were used for semi-automated cell counting with the daime (v  
387 2.0) software<sup>43</sup>. In daime, image histograms were adjusted manually; objects were detected with the  
388 edge detection algorithm and split with a watershed segmentation-based algorithm. Object detection  
389 was improved manually if necessary. Median of cell numbers multiplied by the mixed layer volume  
390 were used to calculate growth rates ( $r$ ) using the natural logarithm plotted against time (Oct – Dec  
391 12). Doubling times were derived as  $dt = \ln(2)/r$  (ref. 44).

## 392 Statistics

393 Canonical correspondence analysis (CCA) was performed with phyloseq<sup>35</sup> in R on the MOB ASV relative  
394 abundance among bacterial 16S rRNA gene sequences and the aaASV percentage of *pmoA* mRNA  
395 sequences. We used a Chi-square dissimilarity matrix and scaled physicochemical parameters (O<sub>2</sub> and  
396 CH<sub>4</sub> concentrations and temperature) as constraints. Constrained axes were tested for significance  
397 with `anova.cca` of `vegan` v2.5.2.

398 Spearman rank correlation between MOB parameters and potential methane oxidation rate were  
399 calculated in R and p values were adjusted for multiple comparisons using the Benjamini & Hochberg  
400 (BH) method.

401 The methane oxidation capacity was calculated based on the median potential methane oxidation  
402 rate in the mixed layer multiplied by the volume of the mixed layer.

#### 403 Data availability

404 The sequencing files have been submitted to the European nucleotide archive under the project  
405 number PRJEB32413. All other data is available from the Eawag Research Data Institutional Collection  
406 ([https://data.eawag.ch/dataset/growth-succession-of-methanotrophs-limit-methane-release-lake-](https://data.eawag.ch/dataset/growth-succession-of-methanotrophs-limit-methane-release-lake-overturn)  
407 [overturn](https://data.eawag.ch/dataset/growth-succession-of-methanotrophs-limit-methane-release-lake-overturn)).

#### 408 Acknowledgements

409 We thank Carsten Schubert and Serge Robert for access to the GC-IRMS and support with methane  
410 oxidation rate measurements and Carsten Schubert for his support, review of the manuscript, and  
411 helpful discussions. We thank Karin Beck, Patrick Kathriner, Miro Meyer and Michael Plüss for  
412 assistance in the field and laboratory. Sequencing data generation and analysis was done in  
413 collaboration with the Genetic Diversity Centre (GDC), ETH Zurich. The research was funded by Swiss  
414 National Science Foundation (grant CR23I3\_156759).

#### 415 Author contributions:

416 MM was responsible for carrying out the research, performed laboratory and data analysis and wrote  
417 the original manuscript. MZ and JD contributed methane oxidation rate measurements and JD  
418 contributed CARD-FISH analyses. MM, MZ, AB performed fieldwork. HB, BW, MZ contributed to

419 writing and reviewing and editing the manuscript. HB, BW, AB conceptualized and supervised the  
420 research, acquired funding and provided the research infrastructure.

#### 421 [Competing interests](#)

422 The authors declare no competing interests.

#### 423 [References](#)

- 424 1. DelSontro, T., Beaulieu, J. J. & Downing, J. A. Greenhouse gas emissions from lakes and  
425 impoundments: Upscaling in the face of global change. *Limnol. Oceanogr. Lett.* **3**, 64–75  
426 (2018).
- 427 2. Bastviken, D., Ejlertsson, J. & Tranvik, L. Measurement of methane oxidation in lakes: A  
428 comparison of methods. *Environ. Sci. Technol.* **36**, 3354–3361 (2002).
- 429 3. Bastviken, D., Cole, J., Pace, M. & Tranvik, L. Methane emissions from lakes: Dependence of  
430 lake characteristics, two regional assessments, and a global estimate. *Global Biogeochem.*  
431 *Cycles* **18**, 1–12 (2004).
- 432 4. Myhre, G. *et al.* Anthropogenic and natural radiative forcing. in *Climate Change 2013: The*  
433 *Physical Science Basis. Contribution of Working Group I to the Fifth Assessment Report of the*  
434 *Intergovernmental Panel on Climate Change* (ed. Stocker, T.F., D. Qin, G.-K. Plattner, M.  
435 Tignor, S.K. Allen, J. Boschung, A. Nauels, Y. Xia, V. Bex, P. M. M.) 659–740 (Cambridge  
436 University Press, 2013).
- 437 5. Taipale, S., Kankaala, P., Hahn, M., Jones, R. & Tirola, M. Methane-oxidizing and  
438 photoautotrophic bacteria are major producers in a humic lake with a large anoxic  
439 hypolimnion. *Aquat. Microb. Ecol.* **64**, 81–95 (2011).
- 440 6. Kankaala, P., Taipale, S., Nykänen, H. & Jones, R. I. Oxidation, efflux, and isotopic



- 441 fractionation of methane during autumnal turnover in a polyhumic, boreal lake. *J. Geophys.*  
442 *Res. Biogeosciences* **112**, 1–7 (2007).
- 443 7. Schubert, C. J., Diem, T. & Eugster, W. Methane emissions from a small wind shielded lake  
444 determined by eddy covariance, flux chambers, anchored funnels, and boundary model  
445 calculations: A comparison. *Environ. Sci. Technol.* **46**, 4515–4522 (2012).
- 446 8. Encinas Fernández, J., Peeters, F. & Hofmann, H. Importance of the autumn overturn and  
447 anoxic conditions in the hypolimnion for the annual methane emissions from a temperate  
448 lake. *Environ. Sci. Technol.* **48**, 7297–7304 (2014).
- 449 9. Oswald, K. *et al.* Crenothrix are major methane consumers in stratified lakes. *ISME J.* **11**,  
450 2124–2140 (2017).
- 451 10. Biderre-Petit, C. *et al.* Identification of microbial communities involved in the methane cycle  
452 of a freshwater meromictic lake. *FEMS Microbiol. Ecol.* **77**, 533–545 (2011).
- 453 11. Bleses, J. *et al.* Micro-aerobic bacterial methane oxidation in the chemocline and anoxic water  
454 column of deep south-Alpine Lake Lugano (Switzerland). *Limnol. Oceanogr.* **59**, 311–324  
455 (2014).
- 456 12. Kojima, H., Iwata, T. & Fukui, M. DNA-based analysis of planktonic methanotrophs in a  
457 stratified lake. *Freshw. Biol.* **54**, 1501–1509 (2009).
- 458 13. Salcher, M. M. Same same but different: ecological niche partitioning of planktonic  
459 freshwater prokaryotes. *J. Limnol.* **73**, 74–87 (2014).
- 460 14. Zimmermann, M. *et al.* Lake overturn as a key driver for methane oxidation. *bioRxiv* (2019).  
461 doi:<https://doi.org/10.1101/689182>
- 462 15. Schubert, C. J. *et al.* Oxidation and emission of methane in a monomictic lake (Rotsee,

- 463 Switzerland). *Aquat. Sci.* **72**, 455–466 (2010).
- 464 16. Mayr, M. J., Zimmermann, M., Guggenheim, C., Brand, A. & Bürgmann, H. Niche partitioning  
465 of methane-oxidizing bacteria along the oxygen-methane counter gradient of stratified lakes.  
466 *ISME J (in press)*.
- 467 17. Rahalkar, M. C., Bussmann, I. & Schink, B. *Methylosoma difficile* gen. nov., sp. nov., a novel  
468 methanotroph enriched by gradient cultivation from littoral sediment of Lake Constance. *Int.*  
469 *J. Syst. Evol. Microbiol.* **57**, 1073–1080 (2007).
- 470 18. Trotsenko, Y. A. & Khmelenina, V. N. Aerobic methanotrophic bacteria of cold ecosystems.  
471 *FEMS Microbiol. Ecol.* **53**, 15–26 (2005).
- 472 19. Oswald, K. *et al.* Light-dependent aerobic methane oxidation reduces methane emissions  
473 from seasonally stratified lakes. *PLoS One* **10**, 1–22 (2015).
- 474 20. Kirf, M. K. *et al.* Redox gradients at the low oxygen boundary of lakes. *Aquat. Sci.* **77**, 81–93  
475 (2015).
- 476 21. Wise, M. G., McArthur, J. V & Shimkets, L. J. *Methylosarcina fibrata* gen. nov., sp. nov. and  
477 *Methylosarcina quisquiliarum* sp. nov., novel type 1 methanotrophs. *Int. J. Syst. Evol.*  
478 *Microbiol.* **51**, 611–621 (2001).
- 479 22. Bastviken, D., Cole, J. J., Pace, M. L. & Van de-Bogert, M. C. Fates of methane from different  
480 lake habitats: Connecting whole-lake budgets and CH<sub>4</sub> emissions. *J. Geophys. Res.*  
481 *Biogeosciences* **113**, 1–13 (2008).
- 482 23. Utsumi, M. *et al.* Dynamics of dissolved methane and methane oxidation in dimictic Lak Nojiri  
483 during winter. *Limnol. Oceanogr.* **43**, 10–17 (1998).
- 484 24. Messenger, M. L., Lehner, B., Grill, G., Nedeva, I. & Schmitt, O. Estimating the volume and age

- 485 of water stored in global lakes using a geo-statistical approach. *Nat. Commun.* **7**, 1–11 (2016).
- 486 25. Jenny, J.-P. *et al.* Urban point sources of nutrients were the leading cause for the historical  
487 spread of hypoxia across European lakes. *Proc. Natl. Acad. Sci.* **113**, 12655–12660 (2016).
- 488 26. Beaulieu, J. J., DelSontro, T. & Downing, J. A. Eutrophication will increase methane emissions  
489 from lakes and impoundments during the 21st century. *Nat. Commun.* **10**, 1375 (2019).
- 490 27. Kirf, M. K., Dinkel, C., Schubert, C. J. & Wehrli, B. Submicromolar oxygen profiles at the oxic-  
491 anoxic boundary of temperate lakes. *Aquat. Geochemistry* **20**, 39–57 (2014).
- 492 28. Proctor, C. R. *et al.* Phylogenetic clustering of small low nucleic acid-content bacteria across  
493 diverse freshwater ecosystems. *ISME J.* **12**, 1344–1359 (2018).
- 494 29. Wiesenburg, D. A. & Guinasso, N. L. Equilibrium solubilities of methane, carbon monoxide,  
495 and hydrogen in water and sea water. *J. Chem. Eng. Data* **24**, 356–360 (1979).
- 496 30. Klindworth, A. *et al.* Evaluation of general 16S ribosomal RNA gene PCR primers for classical  
497 and next-generation sequencing-based diversity studies. *Nucleic Acids Res.* **41**, 1–11 (2013).
- 498 31. Costello, A. M. & Lidstrom, M. E. Molecular characterization of functional and phylogenetic  
499 genes from natural populations of methanotrophs in lake sediments. *Appl. Environ. Microbiol.*  
500 **65**, 5066–74 (1999).
- 501 32. Callahan, B. J. *et al.* DADA2 : High resolution sample inference from amplicon data. *Nat.*  
502 *Methods* **13**, 581–583 (2016).
- 503 33. R Core Team. A language and environment for statistical computing. (2017).
- 504 34. Quast, C. *et al.* The SILVA ribosomal RNA gene database project: Improved data processing  
505 and web-based tools. *Nucleic Acids Res.* **41**, 590–596 (2013).

- 506 35. McMurdie, P. J. & Holmes, S. Phyloseq: An R Package for Reproducible Interactive Analysis  
507 and Graphics of Microbiome Census Data. *PLoS One* **8**, 1–11 (2013).
- 508 36. Knief, C. Diversity and habitat preferences of cultivated and uncultivated aerobic  
509 methanotrophic bacteria evaluated based on *pmoA* as molecular marker. *Front. Microbiol.* **6**,  
510 1–38 (2015).
- 511 37. Kumar, S., Stecher, G. & Tamura, K. MEGA7: Molecular evolutionary genetics analysis version  
512 7.0 for bigger datasets. *Mol. Biol. Evol.* **33**, 1870–1874 (2016).
- 513 38. Henneberger, R. *et al.* Field-scale tracking of active methane-oxidizing communities in a  
514 landfill cover soil reveals spatial and seasonal variability. *Environ. Microbiol.* **17**, 1721–1737  
515 (2015).
- 516 39. Holtappels, M., Lavik, G., Jensen, M. M. & Kuypers, M. M. M. 15N-labeling experiments to  
517 dissect the contributions of heterotrophic denitrification and anammox to nitrogen removal  
518 in the OMZ waters of the ocean. *Methods Enzymol.* **486**, 224–246 (2011).
- 519 40. Eller, G., Stubner, S. & Frenzel, P. Group-specific 16S rRNA targeted probes for the detection  
520 of type I and type II methanotrophs by fluorescence in situ hybridisation. *FEMS Microbiol.*  
521 *Lett.* **198**, 91–97 (2001).
- 522 41. Daims, H., Brühl, A., Amann, R., Schleifer, K. H. & Wagner, M. The domain-specific probe  
523 EUB338 is insufficient for the detection of all bacteria: Development and evaluation of a more  
524 comprehensive probe set. *Syst. Appl. Microbiol.* **22**, 434–444 (1999).
- 525 42. Wallner, G., Amann, R. & Beisker, W. Optimizing fluorescent in situ hybridization with rRNA-  
526 targeted oligonucleotide probes for flow cytometric identification of microorganisms.  
527 *Cytometry* **14**, 136–143 (1993).

528 43. Daims, H., Lücker, S. & Wagner, M. Daime, a Novel Image Analysis Program for Microbial  
529 Ecology and Biofilm Research. *Environ. Microbiol.* **8**, 200–213 (2006).

530 44. Graham, L. E., Graham, J. M. & Wilcox, L. W. *Algae*. (Pearson Benjamin Cummings, 2009).

531
